# Supplementary material for: Efficacy of MRI data harmonization in the age of machine learning: a multicenter study across 36 datasets
Source: PubMed Central journal article supplement (PMC10805868; doi:10.1038/s41597-023-02421-7), 2024-01-23
Supplement: 41597_2023_2421_MOESM1_ESM.pdf [file 41597_2023_2421_MOESM1_ESM.pdf]

## **Supplementary Information**

### **Table of contents**

Supplementary Table 1

**Table S1.** Description of the demographic characteristics of each single-center dataset. Data from single-center datasets have been included in one specific meta-dataset considering the following age ranges: CHILDHOOD (5 – 13 years), ADOLESCENCE (11 – 20 years), and ADULTHOOD (18 – 87 years) (more details in section 2.1). All single-center datasets have also been included in the LIFESPAN meta-dataset.

| Dataset        | Institution                                                                                                                    | # participants | Females (%) | Age range<br>min-max | Age median (IQR) | Meta-dataset |
|----------------|--------------------------------------------------------------------------------------------------------------------------------|----------------|-------------|----------------------|------------------|--------------|
| ABIDEI-CALTECH | California Institute of Technology                                                                                             | 19             | 21.05       | 17.0 - 56.2          | 23.6 (15.85)     | ADULTHOOD    |
| ABIDEI-CMU     | Carnegie Mellon<br>University                                                                                                  | 13             | 23.08       | 20.0 - 40.0          | 27.0 (9.0)       |              |
| ABIDEI-KKI     | Kennedy Krieger Institute                                                                                                      | 33             | 27.27       | 8.07 - 12.77         | 9.97 (1.54)      | CHILDHOOD    |
| ABIDEI-LEUVEN  | University of Leuven                                                                                                           | 35             | 14.29       | 12.2 - 29.0          | 16.6 (7.95)      | ADOLESCENCE  |
| ABIDEI-MAX_MUN | Ludwig Maximilians<br>University Munich                                                                                        | 33             | 12.12       | 7.0 - 48.0           | 26.0 (9.0)       | ADULTHOOD    |
| ABIDEI-NYU     | New York University Langone Medical Center                                                                                     | 105            | 24.76       | 6.47 - 31.78         | 14.38 (8.99)     | ADOLESCENCE  |
| ABIDEI-OHSU    | Oregon Health & Science University                                                                                             | 15             | 0           | 8.2 - 11.99          | 10.08 (1.31)     | CHILDHOOD    |
| ABIDEI-OLIN    | Olin Center, Institute of Living at Hartford Hospital                                                                          | 16             | 12.5        | 10.0 - 23.0          | 16.5 (6.25)      | ADOLESCENCE  |
| ABIDEI-PITT    | University of Pittsburgh School of Medicine                                                                                    | 27             | 14.81       | 9.44 - 33.24         | 17.13 (8.3)      | ADOLESCENCE  |
| ABIDEI-SBL     | Social Brain Lab<br>BCN NeuroImaging Center, University Medical Center<br>Groningen and Netherlands Institute for Neuroscience | 15             | 0           | 20.0 - 42.0          | 36.0 (11.5)      | ADULTHOOD    |
| ABIDEI-SDSU    | San Diego State University                                                                                                     | 22             | 27.27       | 8.67 - 16.88         | 14.42 (2.45)     | ADOLESCENCE  |

|                  |                                            |     |       |               |              |             |
|------------------|--------------------------------------------|-----|-------|---------------|--------------|-------------|
| ABIDEI-STANFORD  | Stanford University                        | 20  | 20    | 7.75 - 12.43  | 9.41 (2.57)  | CHILDHOOD   |
| ABIDEI-TRINITY   | Trinity College Dublin                     | 25  | 0     | 12.04 - 25.66 | 15.91 (5.25) | ADOLESCENCE |
| ABIDEI-UCLA      | University of California,<br>Los Angeles   | 47  | 12.77 | 9.21 - 17.79  | 12.68 (2.16) | ADOLESCENCE |
| ABIDEI-UM        | University of Michigan                     | 77  | 23.38 | 8.2 - 28.8    | 14.8 (5.0)   |             |
| ABIDEI-USM       | University of Utah<br>School of Medicine   | 43  | 0     | 8.77 - 39.39  | 19.76 (10.4) |             |
| ABIDEII-BNI_1    | Barrow Neurological Institute              | 29  | 0     | 18.0 - 64.0   | 43.0 (27.0)  | ADULTHOOD   |
| ABIDEII-EMC_1    | Erasmus University Medical Centre          | 27  | 18.52 | 6.33 - 10.12  | 8.19 (1.41)  | CHILDHOOD   |
| ABIDEII-ETH_1    | ETH Zürich                                 | 24  | 0     | 13.83 - 30.67 | 24.0 (6.79)  | ADULTHOOD   |
| ABIDEII-GU_1     | Georgetown University                      | 55  | 49.09 | 8.06 - 13.8   | 10.43 (2.96) | CHILDHOOD   |
| ABIDEII-IP_1     | Institut Pasteur and Robert Debré Hospital | 34  | 64.71 | 8.07 - 46.6   | 22.12 (18.8) | ADULTHOOD   |
| ABIDEII-IU_1     | Indiana University                         | 20  | 25    | 19.0 - 37.0   | 22.0 (4.25)  | ADULTHOOD   |
| ABIDEII-KKI_32ch | Kennedy Krieger Institute                  | 45  | 26.67 | 8.06 - 12.67  | 10.27 (1.67) | CHILDHOOD   |
| ABIDEII-KKI_8ch  | Kennedy Krieger Institute                  | 110 | 40    | 8.02 - 12.9   | 10.3 (1.68)  | CHILDHOOD   |
| ABIDEII-NYU_1    | New York University Langone Medical Center | 30  | 6.67  | 5.89 - 23.81  | 9.11 (3.12)  | CHILDHOOD   |
| ABIDEII-OHSU_1   | Oregon Health & Science University         | 56  | 51.79 | 8.0 - 14.0    | 10.0 (2.25)  | CHILDHOOD   |

|                |                                                  |     |       |               |               |             |
|----------------|--------------------------------------------------|-----|-------|---------------|---------------|-------------|
| ABIDEII-SDSU_1 | San Diego State University                       | 25  | 8     | 8.1 - 17.7    | 13.0 (5.2)    | ADOLESCENCE |
| ABIDEII-TCD_1  | Trinity College Dublin                           | 21  | 0     | 10.25 - 20.0  | 15.25 (5.25)  | ADOLESCENCE |
| ABIDEII-UCD_1  | University of California Davis                   | 14  | 28.57 | 12.25 - 17.17 | 14.75 (2.65)  |             |
| ABIDEII-UCLA_1 | University of California,<br>Los Angeles         | 16  | 31.25 | 7.76 - 14.09  | 9.01 (1.43)   | CHILDHOOD   |
| ABIDEII-USM_1  | University of Utah<br>School of Medicine         | 16  | 18.75 | 11.5 - 36.15  | 23.78 (10.72) | ADULTHOOD   |
| ICBM           | International Consortium for Human Brain Mapping | 86  | 52.33 | 19.0 - 85.0   | 44.5 (31.5)   | ADULTHOOD   |
| IXI-Guys       | Guy's Hospital - London                          | 313 | 55.59 | 20.07 - 86.2  | 53.41 (26.08) | ADULTHOOD   |
| IXI-HH         | Hammersmith Hospital - London                    | 181 | 51.38 | 20.17 - 81.94 | 48.05 (28.25) | ADULTHOOD   |
| IXI-IOP        | Institute of Psychiatry - London                 | 67  | 65.67 | 19.98 - 86.32 | 36.16 (19.85) | ADULTHOOD   |
| NKI2           |                                                  | 73  | 41.1  | 6.0 - 17.0    | 12.0 (6.0)    | CHILDHOOD   |

---

IQR: interquartile range
